# Supplementary material
Source: HighWire-hosted journal article supplement (https://www.g3journal.org/content/suppl/2016/08/02/g3.116.031120)
Supplement: FigureS7.pdf [file FigureS7.pdf]

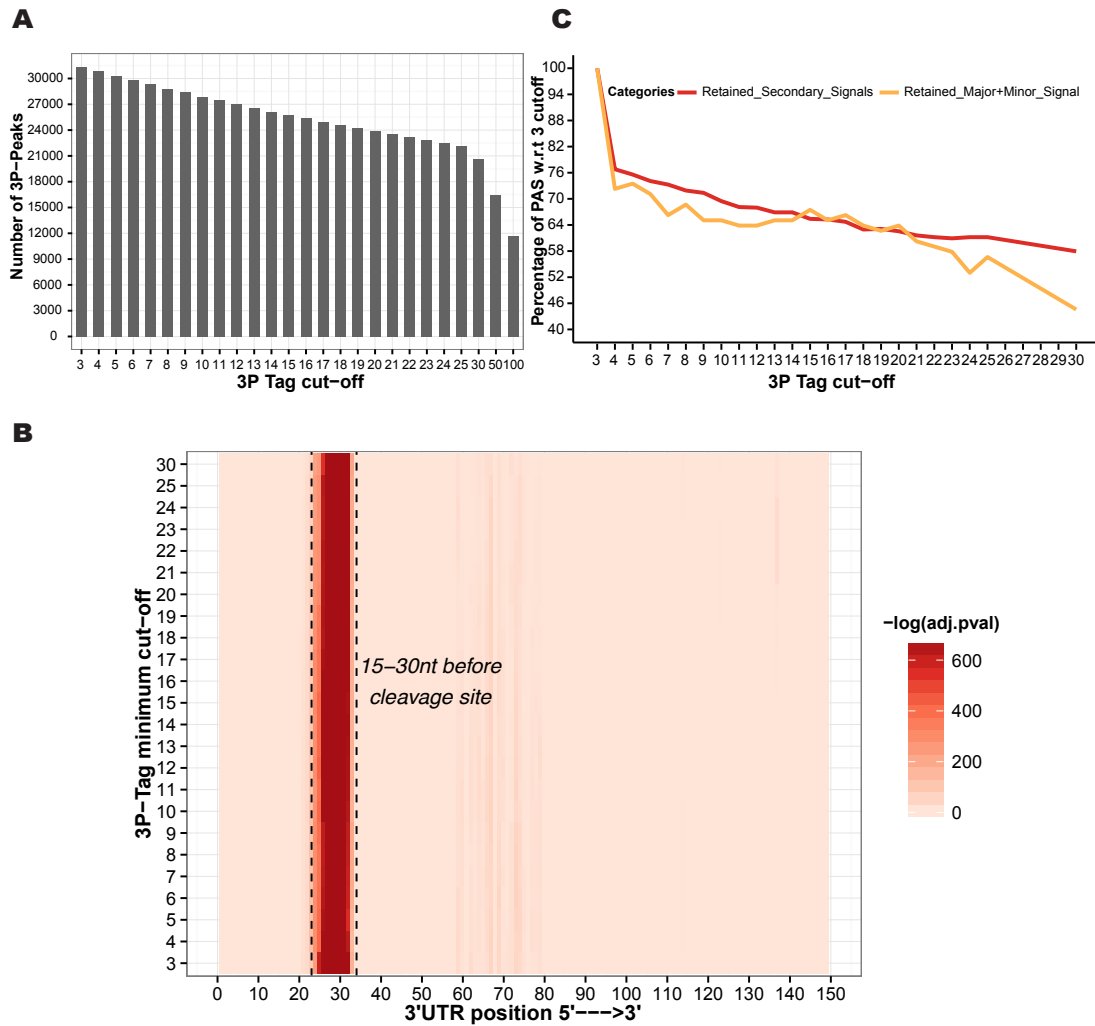

**Figure S7. Retained PolyA signals (PAS) in different 3P-Tags cutoff.** **A)** Bar plot depicting total number of identified cleavage sites (3P-Peaks) at different tag cut-off. **B)** Adjusted *Pvalue* obtained from hexamer enrichment analysis (as described before) for the major signal AAUAAA across 3P-peaks obtained from different 3P tag cutoff. **C)** Overlap percentage of enriched PAS and major+minor signal obtained from three 3P tag cutoff used in this study with other 3P tag cutoffs (4-30).
